# Supplementary material
Source: publisher figshare collection journal article supplement (https://sage.figshare.com/ndownloader/files/23166719)
Supplement: Supplementary file 1 [file 23166719]

# Massive and Submassive Pulmonary Embolism Algorithm

## Hemodynamic or respiratory instability/concern for possible clinical decompensation

- Continue anticoagulation
- Obtain STAT ECHO, BMP, CBC, troponin, BNP, lactate, INR, PTT, fibrinogen, type and screen, bilateral LE Doppler US
- Avoid arterial or non-compressible venous punctures
- Activate PE Response Team

### Massive PE

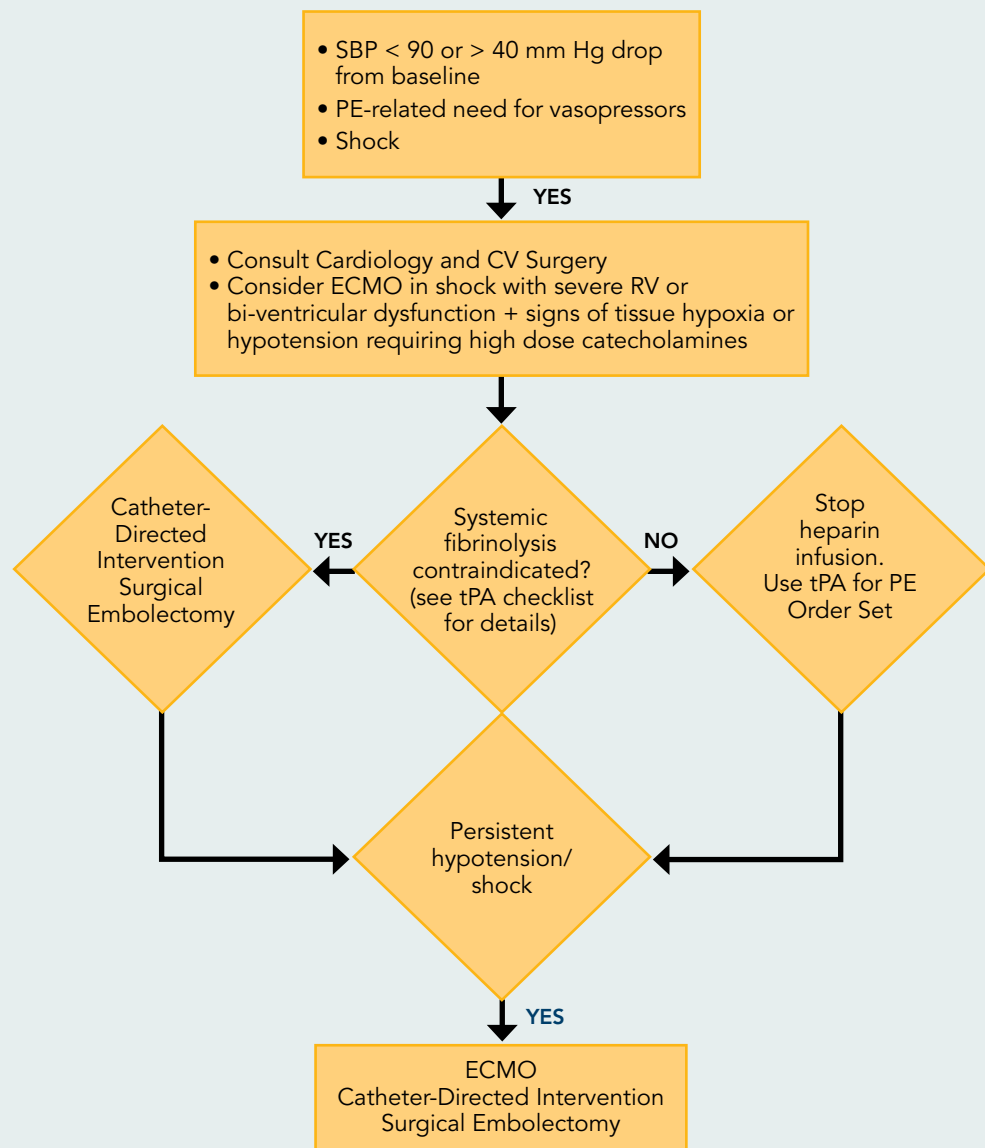

### Submassive PE

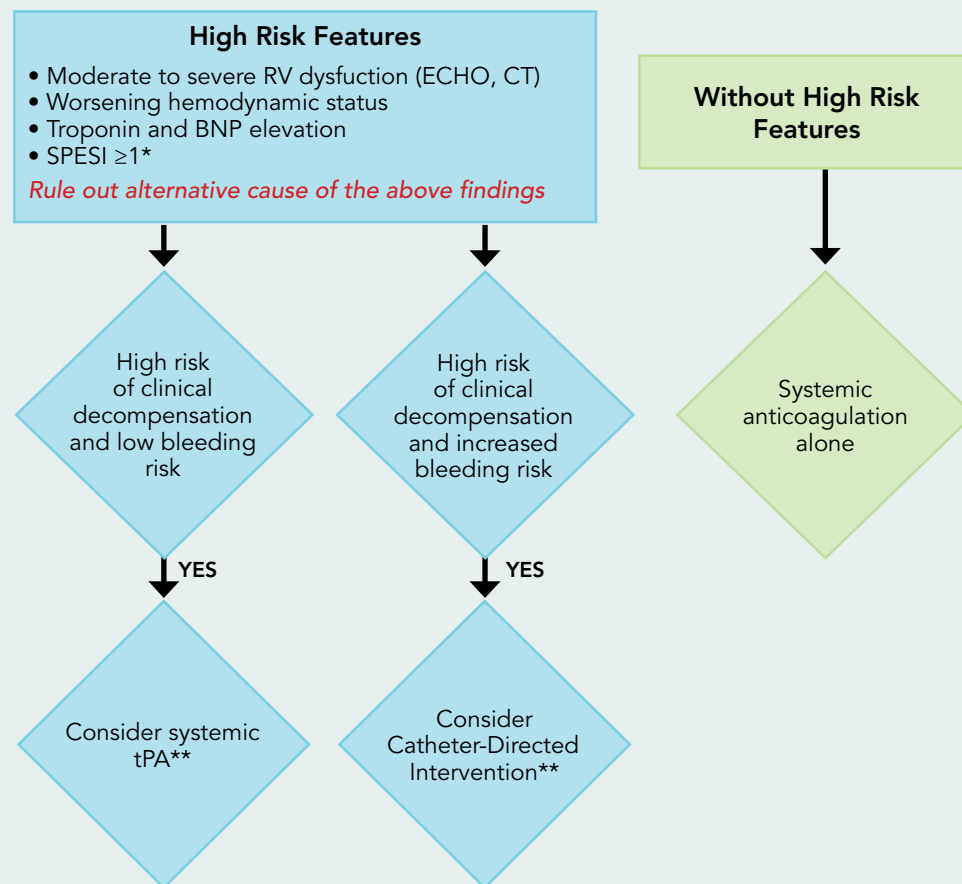

#### Assess the need for IVC filter

##### Established indications:

- Unable to anticoagulate
- Recurrent PE despite adequate anticoagulation

##### Consider in:

- Patients with lower extremity or ilio caval DVT and hemodynamic instability or limited hemodynamic reserve\*\*

#### \* Simplified Pulmonary Embolism Severity Index (SPESI)- predicts overall 30-day mortality

- Age > 80
- History of cancer
- Chronic pulmonary disease
- HR ≥ 110
- SBP < 100
- Arterial O<sub>2</sub> saturation < 90%

\*\* Intervention on a case by case basis.

## Major contraindications

- Active bleeding
- Current or previous intracranial hemorrhage
- Structural intracranial disease
- Ischemic stroke within 3 months
- Head or facial trauma, brain or spine surgery within 12 months (shorter intervals may be applicable)
- Suspected aortic dissection

## Relative Contraindications/Precautions

- Severe, poorly controlled hypertension or current BP  $\geq$  180/110 mm Hg
- Major non-intracranial bleeding in the last 2 months
- Surgery, trauma, or invasive procedure in the last 2 – 4 weeks
- Traumatic or prolonged (>10 min) cardiopulmonary resuscitation
- Lumbar puncture in the past 3 days
- Vascular puncture at a non-compressible site
- Pericarditis or pericardial effusion
- Platelet count < 100,000 mm<sup>3</sup> or anticoagulation resulting in INR > 1.7
- Active peptic ulcer
- Diabetic retinopathy
- Caution in patients currently receiving warfarin, heparin, or antiplatelet drugs
- Caution in pregnancy or h/o parturition in the past 30 days.
- Caution in age > 75 years, Low body weight (< 60 kg)

## Outpatient follow up

PE patients with pulmonary hypertension (RVSP > 40) and/or moderate/severe RV dysfunction should have a repeat ECHO and a cardiology follow up 6- 8 weeks after discharge.

Anticoagulation Clinic follow up in 4–6 weeks after discharge.

## IV TPA Administration and Anticoagulation Highlights

**Reduced Dose tPA** (associated with reduced bleeding risk):

- For high risk submassive PE
- Patient weighing >50 kg: 10 mg bolus followed by 40 mg infusion over 2 hours
- Patient weighing  $\leq$ 50 kg: A total dose of 0.5 mg/kg (10 mg bolus followed by the remaining amount, over 2 hours)

**Full Dose tPA:** 100 mg infusion over 2 hours

**Heparin Infusion:** Stop heparin prior to IV tPA administration

1. Check aPTT 1 hour after the IV TPA infusion completion, then q 1 hour as needed if first aPTT is still too high
2. Resume IV Heparin infusion per VTE Protocol without a bolus when aPTT is < 80

## Catheter-Directed Interventions (CDI) for PE

### Massive PE

- Clot fragmentation or aspiration plus tPA 20-40 mg
- Depending on hemodynamic response, continued local low dose lytic infusion directly into clot (see submassive PE below)

### Submassive PE

- Local infusion through a catheter
  - Total tPA dose is ~24 mg over 12 or 24 hrs locally
  - Bilateral rate 1 mg/hr x 12 hrs, unilateral rate 0.5 mg/hr x 24 hrs
  - Sub-therapeutic heparin @ 500 units/hr during lysis
  - tPA adjustment if fibrinogen < 200
  - tPA is either stopped or cryoprecipitate is given if fibrinogen < 100
  - Hgb, Plt, INR, fibrinogen in 4 hrs, then q 6 hrs
- Therapeutic heparin is continued until in IR suite and restarted when exiting IR suite after completion of procedure (sub-therapeutic heparin regimen during thrombolytic infusion)

### When thrombolysis absolutely contraindicated

- CDI is reserved for Massive or high risk AND clinically deteriorating Submassive PE
- Mechanical clot fragmentation or catheter -aspiration (both typically less effective without tPA)
